# Supplementary material
Source: PubMed Central journal article supplement (PMC2206564)

|                       |       |                                             |  |     |
|-----------------------|-------|---------------------------------------------|--|-----|
|                       |       | 1                                           |  | 40  |
| <i>S. typhimirium</i> | (1)   | MQTPKPTLELLTCDAAAYRENPTALFHVQVCGDRPATLLLES  |  |     |
| <i>S. marcescens</i>  | (1)   | -MNTKPQLTLLKVQASVYRGDPTTLFHVQLCGARPATLLLES  |  |     |
| SgcD                  | (1)   | -----MTDQCVVSAFVVRVTRRLDVKETGALPAYRAIAE     |  |     |
|                       |       | 41                                          |  | 80  |
| <i>S. typhimirium</i> | (41)  | ADIDSKDDLKSLLLVDSALRITALGDTVTIQALSNDNGASL   |  |     |
| <i>S. marcescens</i>  | (40)  | AEINDKQNLQSLLVIDSALPITALGHTVSVQALTANGPAL    |  |     |
| SgcD                  | (35)  | HFGPDEVYLLESAAGPARDRRHQFVGFGALLSLSVT----    |  |     |
|                       |       | 81                                          |  | 120 |
| <i>S. typhimirium</i> | (81)  | LPLLDTALPAGVENDVLPAGRVLRFPPVSPLLDEDARLCS    |  |     |
| <i>S. marcescens</i>  | (80)  | LPVLDALPPEVRNQAARENGRELTFPALDAVQDEDARLRS    |  |     |
| SgcD                  | (71)  | -----DRVVRVEGVPALRGLLLERAGALLEDGPQGLR       |  |     |
|                       |       | 121                                         |  | 160 |
| <i>S. typhimirium</i> | (121) | LSVFDAFRLQGVVNIPTQER-----EAMFFGGLFAYDLV     |  |     |
| <i>S. marcescens</i>  | (120) | LSVFDALRTLTLTVDSPADER-----EAVMLGGLFAYDLV    |  |     |
| SgcD                  | (103) | LRTAGGLWPLLRRAMRDMFD AEGSASGFRFGFLGFFGYDTA  |  |     |
|                       |       | 161                                         |  | 200 |
| <i>S. typhimirium</i> | (156) | AGFEALPHLEAGNN-CPDYCFYLAETLMVIDHQKKSTRIQ    |  |     |
| <i>S. marcescens</i>  | (155) | AGFENLPAVRQDQR-CPDFCFYLAETLLVLDHQRGSARLQ    |  |     |
| SgcD                  | (143) | RYIEDLPHLIENRPGLPDVRMVLHRGSVVTDLATG---RC    |  |     |
|                       |       | 201                                         |  | 240 |
| <i>S. typhimirium</i> | (195) | ASLFTASDREKQRLNARLAYLSQQLTQPAPPLPVTVPVDM    |  |     |
| <i>S. marcescens</i>  | (194) | ASVFSEQASEAQRLQHRIEQQAELQQPPQPIPHQKLENM     |  |     |
| SgcD                  | (180) | ELLLHESPYWPG LAPETVTGLLADVEQAWPDPSADGFPAS   |  |     |
|                       |       | 241                                         |  | 280 |
| <i>S. typhimirium</i> | (235) | RCECNQSDDAFGAVVRQLQKAI RAGEIFQV VPSRRFSLP-  |  |     |
| <i>S. marcescens</i>  | (234) | QLSCNQSD EYGA VVSE LQEAIRQGEIFQV VPSRRFSLP- |  |     |
| SgcD                  | (220) | AVTDDSAPEVFANDVERCLKHIAVGDIIYQVQIGHELSTIRS  |  |     |
|                       |       | 281                                         |  | 320 |
| <i>S. typhimirium</i> | (274) | CPSP LAAYVVLKKS NPSPY MFFMQDNDFTLFGASPESSLK |  |     |
| <i>S. marcescens</i>  | (273) | CPAPLGPYQTLKDN NPSPY MFFMQDDFTLFGASPESSALK  |  |     |
| SgcD                  | (260) | TADPADVYQRLRGRNASPYMYLAGIDGHRLLIGASPEL FVR  |  |     |
|                       |       | 321                                         |  | 360 |
| <i>S. typhimirium</i> | (314) | YDAASRQIEIYPIAGTRPRGRRADGTLDRDLDSRIELDMR    |  |     |
| <i>S. marcescens</i>  | (313) | YDAGNRQIEIYPIAGTRPRGRRADGSLDLDLDSRIELEMR    |  |     |
| SgcD                  | (300) | IEDG--EVTMRPIAGTVPRS-----GADGGIAAGVRLR      |  |     |

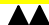

Supplement: pnas_0708750105_1.pdf [file pnas_0708750105_1.pdf]
