# Supplementary material
Source: PubMed Central journal article supplement (PMC2206564)
Supplement: pnas_0708750105_4.pdf [file pnas_0708750105_4.pdf]

1 40

WrbA (1) ----MAKVLVLYYSMYG--HIETMARAVAEGASKVDGAEV  
 Isf (1) ----MKITGISGSPRKGNCEKIIGAALVAKERGFETDT  
 SgcG (1) MSAQLKILAINGSRDGN-TADVLRHAAARVAENRGVDFEA

41 80

WrbA (35) VVKRVPETMP PQLFEKAGGK----TQ-TAPVATPQELADY  
 Isf (37) VFLSNEEVAPCKACGACRDQ-DFCVIIDDDMEIYEKMRAA  
 SgcG (40) VDLRSIRMERC GP CGDCNDRPVACTIADGVP EVVAKMVA

▲ ▲ ▲ ▲

81 120

WrbA (70) DAIIIFGTPTRFGNMSGQMRTFLDQT--GGLWASGALYGKL  
 Isf (76) DGIIVAAPVYMGNYPAQLKALFDRS-VLLRRKNFALKNKV  
 SgcG (80) DGIIFAAPVHGFGTASLMQTFIERAGVGYLRFDRPLSNKV

121 160

WrbA (108) ASVFSSTGTG-GGQEQTITSTWTTLAHGMVIVPIGYAAQ  
 Isf (115) GAALSVGGSRNGGQEKTIQSIHDWMHIHGMIVVGDNSHFG  
 SgcG (120) AGIISVARRYSAGEVWAQLTVNALINRMILVGS GFPA TVH

161 200

WrbA (147) ELFDVSQVRGGTPYGATTIAGGDGSRQPSQEELSIAR YQG  
 Isf (155) GITWNPAEED--TVGMQTVSETAKKLCVLEELIQKNRDK-  
 SgcG (160) ALHRGDALKD--EEGLTNVSR LVERMTDMI ELLDEHRRLT

201 226

WrbA (187) EYVAGLAVKLNG-----  
 Isf (192) -----  
 SgcG (198) GRSDVLA SNEVNERVGLALNELQAQP
