# Supplementary material
Source: PubMed Central journal article supplement (PMC2206564)

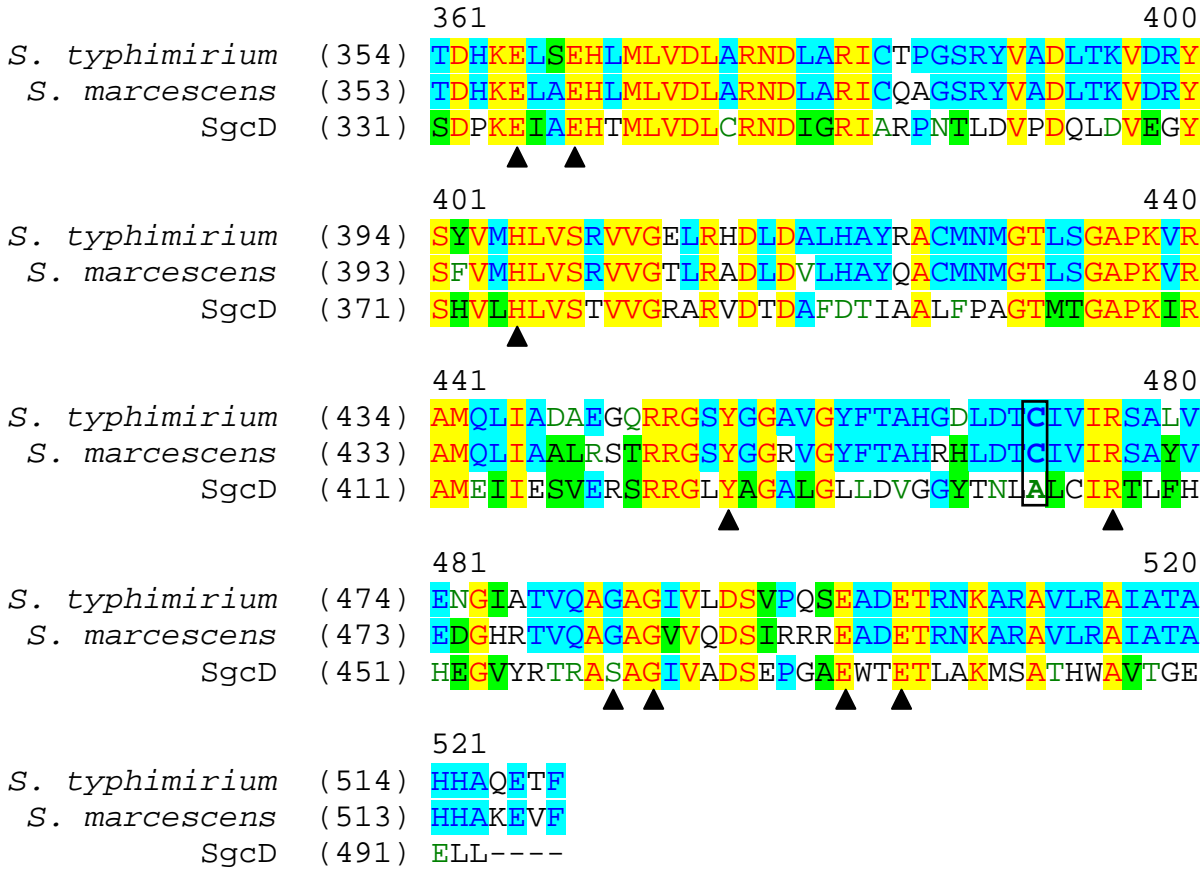

Supplement: pnas_0708750105_2.pdf [file pnas_0708750105_2.pdf]

**A**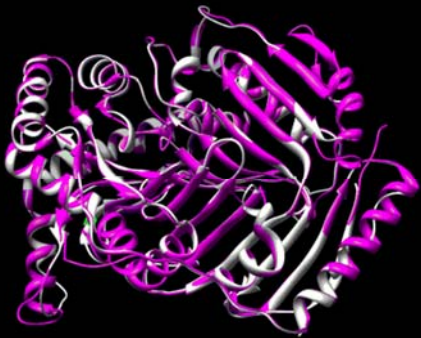**B**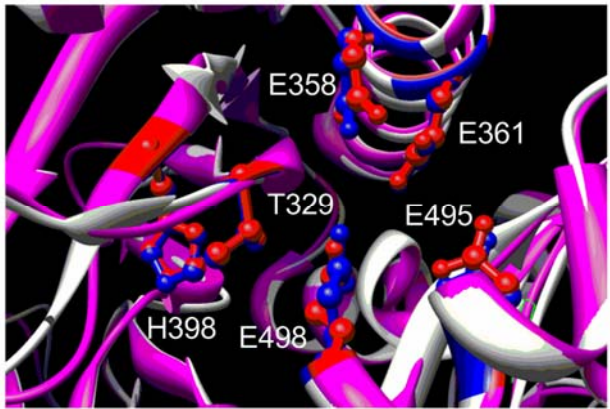

Supplement: pnas_0708750105_3.pdf [file pnas_0708750105_3.pdf]

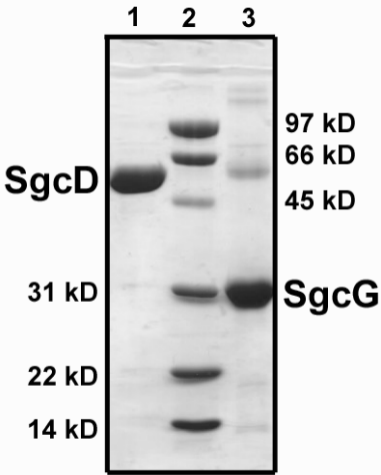

Supplement: pnas_0708750105_5.pdf [file pnas_0708750105_5.pdf]

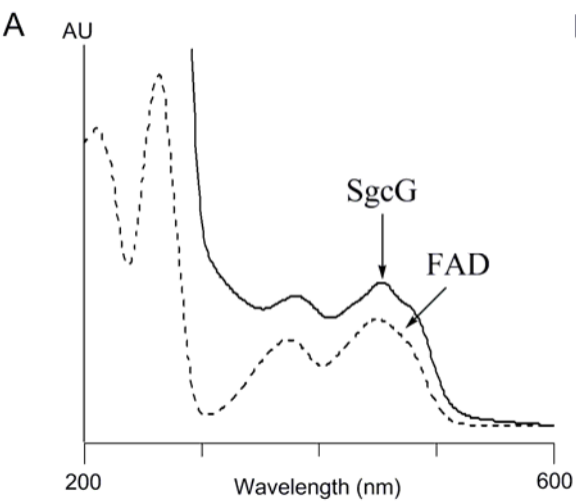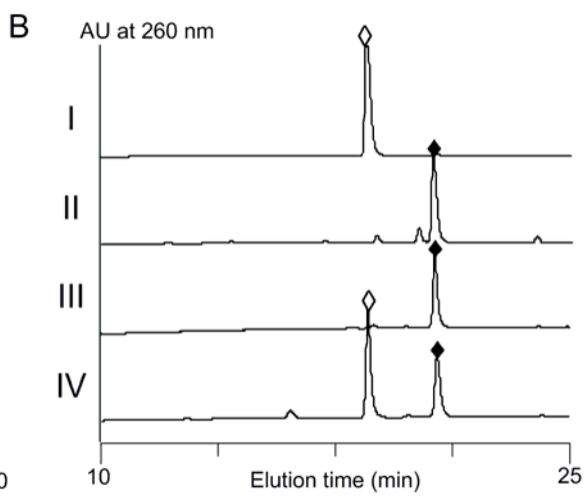

Supplement: pnas_0708750105_6.pdf [file pnas_0708750105_6.pdf]
